# Supplementary material
Source: PubMed Central journal article supplement (PMC6231186)
Supplement: ml8b00373_si_001.pdf [file ml8b00373_si_001.pdf]

# Discovery of JND3229 as a New EGFR<sup>C797S</sup> Mutant Inhibitor with *In Vivo* Mono-drug Efficacy

Xiaoyun Lu<sup>#\*a</sup>, Tao Zhang<sup>#b,e,f</sup>, Su-Jie Zhu<sup>#c</sup>, Qiuju Xun<sup>d,6</sup>, Lingjiang Tong<sup>b</sup>, Xianglong Hu<sup>a</sup>, Yan Li<sup>b</sup>, Shingpan Chan<sup>a</sup>, Yi Su<sup>b</sup>, Yiming Sun<sup>b</sup>, Yi Chen<sup>b</sup>, Jian Ding<sup>b</sup>, Cai-Hong Yun<sup>\*c</sup>, Hua Xie<sup>\*b</sup>, Ke Ding<sup>\*a</sup>

<sup>a</sup> International Cooperative Laboratory of Traditional Chinese Medicine Modernization and Innovative Drug Development of Chinese Ministry of Education (MOE), Guangzhou City Key Laboratory of Precision Chemical Drug Development, School of Pharmacy, Jinan University, 601 Huangpu Avenue West, Guangzhou 510632, China

<sup>b</sup> Division of Anti-Tumor Pharmacology, State Key Laboratory of Drug Research, Shanghai Institute of Materia Medica, Chinese Academy of Sciences, 555 Zu Chong Zhi Road, Shanghai 201203, China

<sup>c</sup> Department of Biophysics and Peking University Institute of Systems Biomedicine, Peking University Health Science Center, Beijing 100191, China

<sup>d</sup> Guangzhou Institutes of Biomedicine and Health, Chinese Academy of Sciences, 190 Kaiyuan Avenue, Guangzhou 510530, China

<sup>e</sup>School of Life Science and Technology, ShanghaiTech University, 393 Middle Huaxia Road, Shanghai 201210, China

<sup>f</sup> School of Pharmacy, University of Chinese Academy of Sciences, No.19A Yuquan Road, Beijing 100049, China

## Supporting Information

### Table of Contents:

|                                                                      |     |
|----------------------------------------------------------------------|-----|
| General Methods for Chemistry .....                                  | S-2 |
| Protein Kinase Assay.....                                            | S-4 |
| Cell Proliferation Inhibition Assay.....                             | S-5 |
| Western Blot Analysis.....                                           | S-5 |
| <i>In Vivo</i> Efficacy for Mouse Tumor Xenografts.....              | S-5 |
| Immunohistochemical (IHC) Assays.....                                | S-5 |
| Protein expression, crystallization and structure determination..... | S-6 |
| The kinases Profiling Study.....                                     | S-8 |

## EXPERIMENTAL SECTION

### General Methods for Chemistry.

All reagents and solvents used were purchased from commercial sources and were of analytical grade. Flash chromatography was performed using 300 mesh silica gel. All reactions were monitored by thin-layer chromatography (TLC), using silica gel plates with fluorescence F254 and ultraviolet (UV) light visualization.  $^1\text{H}$  NMR spectra were recorded on a Bruker AV-400 spectrometer at 400 MHz or a Bruker AV-500 spectrometer at 500MHz.  $^{13}\text{C}$  NMR spectra were recorded on a Bruker AV-500 spectrometer at 125 MHz. Coupling constants ( $J$ ) are expressed in hertz (Hz). Chemical shifts ( $\delta$ ) of NMR are reported in parts per million (ppm) units relative to an internal standard (TMS). Low resolution ESI-MS were recorded on an Agilent 1200 HPLC-MSD mass spectrometer and high resolution ESI-MS on an Applied Biosystems Q-STAR Elite ESI-LC-MS/MS mass spectrometer. Purity of all of the final compounds was determined by reverse-phase high performance liquid chromatography (HPLC) analysis to be >95%. HPLC instrument: Dionex Summit HPLC (Column: Diamonsil C18, 5.0 $\mu\text{m}$ , 4.6 $\times$ 250 mm (Dikma Technologies); detector: PDA-100 photodiode array; injector: ASI-100 autoinjector; pump: p-680A). A flow rate of 1.0 mL/min was used with mobile phase of MeOH in H<sub>2</sub>O with 0.1% modifier (ammonia, v/v).

**Ethyl4-(((1*r*,4*r*)-4-((*tert*-butoxycarbonyl)amino)cyclohexyl)amino)-2-(methylthio)pyrimidine-5-carboxylate (9).** Compound **8** (7.33 g, 34.2 mmol) and potassium carbonate (7.88 g, 57.0 mmol) were added to a solution of **7** (6.63 g, 28.5 mmol) in DMF (30 mL). The resulting solution was stirred at 80 °C overnight. After cooling to room temperature, ice-water (300 mL) was added to the reaction mixture. The precipitate was filtered, and the filter cake was rinsed with additional cool water and then dried in a vacuum oven to give **9** (white solid, 9.96 g, yield 85%), which was used without further purification.  $^1\text{H}$  NMR (400 MHz, CDCl<sub>3</sub>)  $\delta$  8.60 (s, 1H), 8.12 (d,  $J$  = 7.2 Hz, 1H), 4.70 (s, 1H), 4.29 (q,  $J$  = 7.2 Hz, 2H), 4.04–3.99 (m, 1H), 3.47 (s, 1H), 2.50 (s, 3H), 2.13–2.06 (m, 4H), 1.44 (s, 9H), 1.39–1.38 (m, 2H), 1.35 (t,  $J$  = 7.2 Hz, 3H), 1.33–1.30 (m, 2H). LRMS (ESI) for C<sub>19</sub>H<sub>30</sub>N<sub>4</sub>O<sub>4</sub>S [M + H]<sup>+</sup>, calcd: 410.5. Found: 411.2.

***tert*-Butyl((1*r*,4*r*)-4-((5-(hydroxymethyl)-2-(methylthio)pyrimidin-4-yl)amino)cyclohexyl) carbamate (10).** A suspension of LiAlH<sub>4</sub> (1.84 g, 48.4 mmol) in anhydrous THF (50 mL) was added dropwise to a solution of **9** (9.96 g, 24.2 mmol) in anhydrous THF (150 mL) under stirring for 1 h at –40 °C. The reaction mixture was stirred until the temperature was warmed to 0 °C, and then it was treated with 2 mL of water to decompose unreacted LiAlH<sub>4</sub>. Then, a further 6 mL of water was added to the reaction mixture followed by 15% aqueous NaOH (2 mL). The resulting mixture was stirred for 15 min at room temperature and filtered through a pad of Celite. The Celite was washed with THF, and the washes were combined and then concentrated in vacuo. The concentrated mixture was poured into water and extracted with CH<sub>2</sub>Cl<sub>2</sub>. The organic layer was separated, washed with brine, dried with Na<sub>2</sub>SO<sub>4</sub>, filtered, and concentrated in vacuo. The resultant crude material was purified by column chromatography (SiO<sub>2</sub>, CH<sub>2</sub>Cl<sub>2</sub>/ MeOH stepwise elution, 40:1 to 20:1) to give **8** (white solid, 4.47 g, yield 50%).  $^1\text{H}$  NMR (400 MHz, CDCl<sub>3</sub>)  $\delta$  7.60 (s, 1H), 5.83 (d,  $J$  = 7.6 Hz, 1H), 4.46 (s, 2H), 4.45 (s, 1H), 3.96–3.93 (m, 1H), 3.50 (s,

1H), 3.40 (s, 1H), 2.46 (s, 3H), 2.12–2.10 (m, 2H), 2.03–2.02 (m, 2H), 1.42 (s, 9H), 1.28–1.22 (m, 4H). LRMS (ESI) for C<sub>17</sub>H<sub>28</sub>N<sub>4</sub>O<sub>3</sub>S [M + H]<sup>+</sup>, calcd: 368.5. Found: 369.2.

***tert*-Butyl((1*r*,4*r*)-4-((5-formyl-2-(methylthio)pyrimidin-4-yl)amino)cyclohexyl)carbamate (11).** MnO<sub>2</sub> (3.15 g, 36.3 mmol) was added to a solution of **8** (4.47 g, 12.1 mmol) in CH<sub>2</sub>Cl<sub>2</sub> (120 mL). The resulting solution was stirred at room temperature overnight, and then the reaction mixture was filtered through a pad of Celite. Filtration and removal of the solvent gave an oily crude product that was subjected to flash column chromatography (SiO<sub>2</sub>, petroleum ether/ EtOAc stepwise elution, 3:1 to 1:1) to give **11** (white solid, 4.09 g, yield 92%). <sup>1</sup>H NMR (400 MHz, CDCl<sub>3</sub>) δ 9.65 (s, 1H), 8.47 (s, 1H), 8.27 (s, 1H), 4.48 (s, 1H), 4.09–4.01 (m, 1H), 3.46 (s, 1H), 2.51 (s, 3H), 2.12–2.03 (m, 4H), 1.43 (s, 9H), 1.28–1.22 (m, 4H). LRMS (ESI) for C<sub>17</sub>H<sub>26</sub>N<sub>4</sub>O<sub>3</sub>S [M + H]<sup>+</sup>, calcd: 366.5. Found: 367.2

***tert*-Butyl((1*r*,4*r*)-4-((5-(((2-chlorophenyl)amino)methyl)-2-(methylthio)pyrimidin-4-yl)amino)cyclohexyl)carbamate (13).** Compound **12** (1.42 g, 11.2 mmol) and AcOH (0.1 mL) were added to a solution of **11** (2.05 g, 5.58 mmol) in toluene (20 mL). The resulting solution was stirred at 110 °C overnight. After the amine was converted completely to the imine as determined by TLC, NaBH<sub>4</sub> (1.06 g, 27.9 mmol) was added to the reaction mixture at 0 °C. The reaction mixture was allowed to warm to room temperature and stirred for 4 h. The resulting mixture was concentrated in vacuo, partitioned between CH<sub>2</sub>Cl<sub>2</sub> and saturated NaHCO<sub>3</sub>, and extracted with CH<sub>2</sub>Cl<sub>2</sub>. The organic layer was separated, washed with brine, dried with Na<sub>2</sub>SO<sub>4</sub>, filtered, and concentrated in vacuo. The resulting crude material was subjected to flash column chromatography (SiO<sub>2</sub>, petroleum ether/EtOAc, 3:1) to give **13** (white solid, 2.13 g, yield 80%). <sup>1</sup>H NMR (400 MHz, CDCl<sub>3</sub>) δ 8.03 (s, 1H), 7.32 (d, *J* = 8.0 Hz, 1H), 7.19 (t, *J* = 8.0 Hz, 1H), 6.86–6.76 (m, 2H), 5.61 (d, *J* = 4.0 Hz, 1H), 4.38 (s, 1H), 4.18–4.09 (m, 3H), 3.97–3.94 (m, 1H), 3.42 (s, 1H), 2.50 (s, 3H), 2.08–2.01 (m, 4H), 1.44 (s, 9H), 1.25–1.22 (m, 4H). LRMS (ESI) for C<sub>23</sub>H<sub>32</sub>ClN<sub>5</sub>O<sub>2</sub>S [M + H]<sup>+</sup>, calcd: 478.0. Found: 478.1.

***tert*-Butyl((1*r*,4*r*)-4-(3-(2-chlorophenyl)-7-(methylthio)-2-oxo-3,4-dihydropyrimido[4,5-*d*]pyrimidin-1(2*H*)-yl)cyclohexyl)carbamate (14).** DIEA (2.37 mL, 13.4 mmol) and triphosgene (0.53 g, 1.78 mmol) were added to a solution of **13** (2.13 g, 4.46 mmol) in CH<sub>2</sub>Cl<sub>2</sub> at 0 °C. The mixture was poured into a solution of 10% aqueous NaHCO<sub>3</sub> and extracted with CH<sub>2</sub>Cl<sub>2</sub>. The organic layer was separated, washed with 10% aqueous NaHCO<sub>3</sub> and brine, dried with Na<sub>2</sub>SO<sub>4</sub>, filtered, and concentrated in vacuo to give **14** (white solid, 2.11 g, yield 94%), which was used without further purification. <sup>1</sup>H NMR (400 MHz, CDCl<sub>3</sub>) δ 8.06 (s, 1H), 7.48 (d, *J* = 8.0 Hz, 1H), 7.34–7.29 (m, 3H), 4.68–4.60 (m, 1H), 4.54–4.48 (m, 2H), 4.32 (s, 1H), 3.46 (s, 1H), 2.67 (s, 3H), 2.12 (d, *J* = 8.0 Hz, 2H), 1.81 (d, *J* = 8.0 Hz, 2H), 1.45 (s, 9H), 1.27–1.22 (m, 4H). LRMS (ESI) for C<sub>24</sub>H<sub>30</sub>ClN<sub>5</sub>O<sub>3</sub>S [M + H]<sup>+</sup>, calcd: 504.0. Found: 504.2.

***tert*-Butyl((1*r*,4*r*)-4-(3-(2-chlorophenyl)-7-(methylsulfonyl)-2-oxo-3,4-dihydropyrimido[4,5-*d*]pyrimidin-1(2*H*)-yl)cyclohexyl)carbamate (15).** m-CPBA (1.69 g, 8.38 mmol) was added to a solution of **14** (2.11 g, 4.19 mmol) in anhydrous CH<sub>2</sub>Cl<sub>2</sub> (50 mL) at 0 °C under argon. The reaction mixture was allowed to warm to room temperature and then stirred for 4 h. The solution was diluted with CH<sub>2</sub>Cl<sub>2</sub> and then treated with 50% Na<sub>2</sub>S<sub>2</sub>O<sub>3</sub>/NaHCO<sub>3</sub> solution. The organic layer was separated, washed with brine, dried with Na<sub>2</sub>SO<sub>4</sub>, filtered, and concentrated in vacuo. The resulting crude material was subjected to flash column chromatography (SiO<sub>2</sub>, CH<sub>2</sub>Cl<sub>2</sub>/MeOH stepwise elution, 40:1 to 20:1) to give **15** (white solid, 1.98

g, yield 88%). <sup>1</sup>H NMR (400 MHz, CDCl<sub>3</sub>) δ 8.39 (s, 1H), 7.54-7.51 (m, 1H), 7.38-7.34 (m, 3H), 4.84-4.63 (m, 3H), 3.94 (s, 1H), 3.51 (s, 1H), 3.33 (s, 3H), 2.69-2.66 (m, 2H), 1.94-1.91 (m, 1H), 1.84-1.81 (m, 2H), 1.67-1.63 (m, 1H), 1.45 (s, 9H), 1.29-1.24 (m, 2H). LRMS (ESI) for C<sub>24</sub>H<sub>30</sub>ClN<sub>5</sub>O<sub>5</sub>S [M + H]<sup>+</sup>, calcd:536.0. Found:536.2.

**1-((1*r*,4*r*)-4-aminocyclohexyl)-3-(2-chlorophenyl)-7-((3-methyl-4-(4-methylpiperazin-1-yl)phenyl)amino)-3,4-dihydropyrimido[4,5-*d*]pyrimidin-2(1*H*)-one (18).** Compound **16** (444 mg, 2.10 mmol) was added to a solution of **15** (938 mg, 1.75 mmol) in 2-butyl alcohol (5 mL), followed by trifluoroacetic acid (157 μL, 2.10 mmol). The reaction mixture was stirred for 18 h at 110 °C in a sealed tube. The reaction mixture was cooled to room temperature and concentrated in vacuo to give crude product **17** which was used in the next step without purification. Then trifluoroacetic acid (2 mL) was added to a solution of **17** in CH<sub>2</sub>Cl<sub>2</sub> (5 mL), and the resulting mixture was stirred at room temperature for 4 h. The reaction mixture was diluted with CH<sub>2</sub>Cl<sub>2</sub>, basified with saturated aqueous NaHCO<sub>3</sub> to pH = 9, and extracted with CH<sub>2</sub>Cl<sub>2</sub>. The organic layer was separated, washed with 10% aqueous NaHCO<sub>3</sub>, brine, dried with Na<sub>2</sub>SO<sub>4</sub> and then concentrated in vacuo. The resultant crude material was purified by column chromatography (SiO<sub>2</sub>, CH<sub>2</sub>Cl<sub>2</sub>/MeOH/NH<sub>4</sub>OH, 40:1:0.4) to give **18** (white solid, 491 mg, yield 50% for twosteps). <sup>1</sup>H NMR (400 MHz, CDCl<sub>3</sub>) δ 7.95 (s, 1H), 7.50-7.47 (m, 1H), 7.40-7.28 (m, 5H), 7.03 (d, *J* = 8.4 Hz, 1H), 6.96 (s, 1H), 4.75-4.72 (m, 1H), 4.58-4.57 (m, 1H), 4.46-4.43 (m, 1H), 2.95-2.92 (m, 4H), 2.69-2.68 (m, 1H), 2.60-2.58 (m, 6H), 2.36 (s, 3H), 2.33 (s, 3H), 1.95 (d, *J* = 9.2 Hz, 2H), 1.74 (d, *J* = 8.8 Hz, 2H), 1.27-1.25 (m, 2H). LRMS (ESI) for C<sub>30</sub>H<sub>37</sub>ClN<sub>8</sub>O [M + H]<sup>+</sup>, calcd: 561.1. Found: 561.3

***N*-((1*r*,4*r*)-4-(3-(2-chlorophenyl)-7-((3-methyl-4-(4-methylpiperazin-1-yl)phenyl)amino)-2-oxo-3,4-dihydropyrimido[4,5-*d*]pyrimidin-1(2*H*)-yl)cyclohexyl)prop ionamide (6).** DIEA (72 μL, 0.41 mmol) and propanoic acid (24 μL, 0.32 mmol) were added to a solution of HATU (122 mg, 0.32 mmol) in anhydrous CH<sub>2</sub>Cl<sub>2</sub> (10 mL) at rt. After stirring for 10 min, **18** (115 mg, 0.21 mmol) was added to the resulting mixture, and then the mixture was stirred at room temperature for 0.5 h. The reaction mixture was poured into H<sub>2</sub>O and extracted with CH<sub>2</sub>Cl<sub>2</sub>. The organic layer was separated, washed with 10% aqueous NaHCO<sub>3</sub>, brine and dried with Na<sub>2</sub>SO<sub>4</sub>. The resultant crude material was purified by column chromatography (SiO<sub>2</sub>, CH<sub>2</sub>Cl<sub>2</sub>/MeOH/NH<sub>4</sub>OH, 40:1:0.4) to give **6** (White solid, 116 mg, yield 90%). <sup>1</sup>H NMR (400 MHz, CDCl<sub>3</sub>) δ 7.96 (s, 1H), 7.57-7.54 (m, 1H), 7.50-7.48 (m, 1H), 7.37-7.27 (m, 3H), 7.23 (s, 1H), 7.15 (s, 0.5H), 7.03 (s, 0.5H), 6.95 (s, 1H), 5.27 (d, *J* = 8.0 Hz, 1H), 4.70-4.64 (m, 1H), 4.60-4.57 (m, 1H), 4.47-4.44 (m, 1H), 3.88-3.80 (m, 1H), 3.01-2.99 (m, 4H), 2.74 (br s, 6H), 2.48 (s, 3H), 2.33 (s, 3H), 2.19 (q, *J* = 7.6 Hz, 2H), 2.11-2.08 (m, 2H), 1.86-1.76 (m, 4H), 1.15 (t, *J* = 7.6 Hz, 3H). <sup>13</sup>C NMR (125 MHz, CDCl<sub>3</sub>) δ 173.3, 159.5, 158.0, 153.3, 153.1, 147.0, 139.6, 134.9, 133.7, 132.9, 130.7, 129.5, 129.3, 128.2, 123.0, 120.0, 118.8, 103.4, 55.9, 54.6, 51.8, 47.8, 47.1, 46.0, 33.2, 30.0, 27.7, 27.6, 18.0, 10.1. HRMS (ESI) for C<sub>33</sub>H<sub>41</sub>ClN<sub>8</sub>O<sub>2</sub> [M + H]<sup>+</sup>, calcd: 617.3114. Found: 617.3093. HPLC analysis: MeOH-H<sub>2</sub>O (85:15), 13.44 min, 97.01% purity.

### Protein Kinase Assay

EGFR<sup>L858R/T790M</sup> kinase protein was purchased from Eurofins Scientific. EGFR<sup>L858R/T790M/C797S</sup> kinase proteins were purchased from BPS Bioscience. Tyrosine kinase activity was evaluated by an enzyme-linked-immunosorbent assay (ELISA) in 96-well plates pre-coated with 2.5 μg/well poly(Glu, Tyr)

4:1 (Sigma) as a substrate. Fifty microliters of 10  $\mu\text{mol/L}$  ATP solution diluted in reaction buffer [50 mmol/L HEPES, pH 7.4, 20 mmol/L  $\text{MgCl}_2$ , 0.1 mmol/L  $\text{MnCl}_2$ , 0.2 mmol/L  $\text{Na}_3\text{VO}_4$ , and 1 mmol/L DTT] was added to each well. Various concentrations of compounds diluted in DMSO were added to each reaction well. A total volume of 1  $\mu\text{L}$  DMSO was used as the vehicle control. The kinase reaction was initiated by adding purified tyrosine kinase proteins diluted in 49  $\mu\text{L}$  of kinase reaction buffer. After incubation for 1 h at 37  $^\circ\text{C}$ , the plate was washed three times with phosphate buffered saline containing 0.1% Tween 20 (PBST). Next, 100  $\mu\text{L}$  of antiphosphotyrosine (PY99; 1:500 dilution) antibody was added. After 0.5 h incubation at 37  $^\circ\text{C}$ , the plate was washed three times and goat anti-mouse IgG horseradish peroxidase (100  $\mu\text{L}$  of a 1:2000 dilution) diluted in PBST containing 5 mg/mL BSA was added. The plate was reincubated at 37  $^\circ\text{C}$  for 0.5 h and washed as before. Finally, 100  $\mu\text{L}$  of color development solution (0.03%  $\text{H}_2\text{O}_2$  and 2 mg/mL o-phenylenediamine in 0.1 mol/L citrate buffer, pH 5.4) was added and the plate was incubated at room temperature until color emerged. The reaction was terminated by the addition of 50  $\mu\text{L}$  of 2 mol/L  $\text{H}_2\text{SO}_4$ , and the A490 was measured using a multi-well spectrophotometer (SpectraMax Plus384, Molecular Devices).

### **Cell Proliferation Inhibition Assay**

Cell proliferation was evaluated using the Resazurin (7-hydroxy-3H-phenoxazin-3-one 10-oxide) Assay. BaF3-EGFR<sup>19D/T790M/C797S</sup> and BaF3-EGFR<sup>L858R/T790M/C797S</sup> cell lines were built by Jian Ding's laboratory, and cultured in RPMI-1640 (GE Healthcare) supplemented with 10% fetal bovine serum (Gibico) and 1  $\mu\text{g/ml}$  puromycin (Sigma). Cells were seeded in 96-well plates (10,000 cells per well) and grown overnight. The cells were treated with various concentrations of the compounds for 72 h. Then 10  $\mu\text{L}$  of resazurin solution (500  $\mu\text{M}$  resazurin solution in DPBS, Sigma) were added to each well, and the cells were incubated for 2h at 37  $^\circ\text{C}$ . The Fluorescence signals were measured at an excitation wavelength at 540 nm and an emission wavelength at 590 nm using a microplate reader (Synergy2, BioTek). The percent inhibition rate for cell proliferation was calculated as  $[1 - (A_{540/590\text{treated}}/ A_{540/590\text{control}})] \times 100\%$ . The  $\text{IC}_{50}$  value was obtained using the Logit method.

### **Western Blot Analysis**

Cells were collected and suspended in lysis buffer (100 mmol/L Tris-HCl, pH6.8, 200 mmol/L DTT, 4% SDS, 0.2% bromophenol blue, 20% glycerol). Equivalent amounts of proteins were loaded and separated by 10% SDS-PAGE and transferred to nitrocellulose membranes. Western blot analysis was subsequently performed using standard procedures. Antibodies used for immune detection of proteins p-EGFR (Y1068; #3777S), EGFR (#4267S), and Tubulin (#2128L) were purchased from Cell Signaling technology.

### **In Vivo Efficacy for Mouse Tumor Xenografts.**

4-6 weeks-old BALB/c mice were purchased from the Shanghai Laboratory Animal Research Center (Shanghai, China). All studies conformed the Animal Care and Use Committee guidelines of China. Approximately 1.5  $\text{mm}^3$  BaF3-EGFR<sup>19D/T790M/C797S</sup> tumor tissue was implanted subcutaneously into the right flank per mice. The mice were randomized into vehicle and treated groups. Forty eight hours later (day 0), for efficacy studies, mice were dosed either vehicle or inhibitors using the indicated doses for maximum 10 days. The average tumor volume (TV) was measured with vernier calipers every 2 or 3 days

then was calculated with the formula  $V = (L \times W^2)/2$ , and L stands for length and W is width, the tumor growth inhibition (TGI) =  $[1 - RTV(\text{treated})/RTV(\text{control})] \times 100\%$ . Meanwhile, the body weight of mice was measured.

### Immunohistochemical (IHC) Assays

After the treatment, BaF3-EGFR<sup>19D/T790M/C797S</sup> xenograft mouse models were harvested and fixed in formalin. Tumor samples were embedded in paraffin and prepared in sections (4 $\mu$ m). The immunohistochemical analysis was conducted by Shanghai ZuoChengBio Ltd., and the assay was operated according to the manufacturer's instructions. Sections were stained with p-EGFR (Y1068; #3777S, Cell Signaling Technology) antibody using optimized protocols.

### Protein expression, crystallization and structure determination

Construct spanning residues 696-1022 of EGFR<sup>T790M/C797S</sup> were expressed and purified using the baculovirus/insect cell system as described.<sup>1</sup> Crystals used in this study were prepared by hanging drop vapor diffusion. For co-crystallization, the compound JND3229 was added to 10.5 mg/mL EGFR<sup>T790M/C797S</sup> proteins to a final concentration of 2mM and incubated at 4°C for two hours before setting up the crystallization tray. The reservoir solution for growing crystals was 0.05 M HEPES pH 8.0, 0.2 M ZnSO<sub>4</sub>, 25% PEG6000. The diffraction data were collected on beamline BL19U1 at Shanghai Synchrotron Radiation Facility (SSRF). The diffraction data were processed using HKL3000.<sup>2</sup> The structure was solved by molecular replacement with Phaser using the previously determined EGFR L858R+ANP structure (PDB ID 2itv)<sup>1</sup> as the search model. Repeated rounds of manual refitting and crystallographic refinement were then performed using COOT<sup>3</sup> and Phenix.<sup>4</sup> The inhibitor was modeled into the closely fitting positive Fo-Fc electron density and included in following refinement cycles. Topology and parameter files for the inhibitor were generated using Phenix.<sup>4</sup> The diffraction data collection and refinement statistics were summarized in Table 1.

**Table S1.** Data collection and refinement statistics of complex crystal structure of EGFR<sup>T790M/C797S</sup> with JND3229.

|                                                     | T790M/C797S + JND3229 |
|-----------------------------------------------------|-----------------------|
| <b>Data collection</b>                              |                       |
| Space group                                         | I23                   |
| Cell dimensions                                     |                       |
| <i>a</i> , <i>b</i> , <i>c</i> (Å)                  | 148.7, 148.7, 148.7   |
| $\alpha$ , $\beta$ , $\gamma$ (°)                   | 90.0, 90.0, 90.0      |
| Resolution (Å)                                      | 50.0-2.65 (2.71-2.65) |
| <i>R</i> <sub>merge</sub>                           | 0.127 (0.353)         |
| <i>I</i> / $\sigma$                                 | 6.0 (2.0)             |
| Completeness (%)                                    | 100.0 (100.0)         |
| Redundancy                                          | 18.0 (17.7)           |
| <b>Refinement</b>                                   |                       |
| Resolution (Å)                                      | 47.0-2.65             |
| No. reflections                                     | 16080                 |
| <i>R</i> <sub>work</sub> / <i>R</i> <sub>free</sub> | 0.232/0.272           |
| No. atoms                                           |                       |

|                   |              |
|-------------------|--------------|
| Protein           | 2278         |
| Ligand/ion        | 45           |
| Water             | 38           |
| <i>B</i> -factors |              |
| Protein           | 66.5         |
| Ligand/ion        | 64.4         |
| Water             | 64.4         |
| R.m.s. deviations |              |
| Bond lengths (Å)  | 0.009        |
| Bond angles (°)   | 1.138        |
| Ramachandran Plot |              |
| Favored regions   | 272 (94.44%) |
| Allowed regions   | 16 (5.56%)   |
| Outliers          | 0 (0.00%)    |

§ Values in parentheses are for highest-resolution shell.

### The kinases Profiling Study

For most assays, kinase-tagged T7 phage strains were grown in parallel in 24-well blocks in an E. coli host derived from the BL21 strain. E. coli were grown to log-phase and infected with T7 phage from a frozen stock (multiplicity of infection = 0.4) and incubated with shaking at 32°C until lysis (90-150 minutes). The lysates were centrifuged (6,000 x g) and filtered (0.2µm) to remove cell debris. The remaining kinases were produced in HEK-293 cells and subsequently tagged with DNA for qPCR detection. Streptavidin-coated magnetic beads were treated with biotinylated small molecule ligands for 30 minutes at room temperature to generate affinity resins for kinase assays. The liganded beads were blocked with excess biotin and washed with blocking buffer (SeaBlock (Pierce), 1 % BSA, 0.05 % Tween 20, 1 mM DTT) to remove unbound ligand and to reduce non-specific phage binding. Binding reactions were assembled by combining kinases, liganded affinity beads, and test compounds in 1x binding buffer (20 %SeaBlock, 0.17x PBS, 0.05 % Tween 20, 6 mM DTT). Test compounds were prepared as 40x stocks in 100% DMSO and directly diluted into the assay. All reactions were performed in polypropylene 384-well plates in a final volume of 0.02 ml. The assay plates were incubated at room temperature with shaking for 1 hour and the affinity beads were washed with wash buffer (1x PBS, 0.05 %Tween 20). The beads were then re-suspended in elution buffer (1x PBS, 0.05 % Tween 20, 0.5 µM non-biotinylated affinity ligand) and incubated at room temperature with shaking for 30 minutes. The kinase concentration in the eluates was measured by qPCR.

**Table S2. Matrix of Compound Screen for JND3229 (Assigned the name as D3003 in the assay)**

| Target                        | D3003          | Target              | D3003          |
|-------------------------------|----------------|---------------------|----------------|
| Gene Symbol                   | %Ctrl @ 1000nM | Gene Symbol         | %Ctrl @ 1000nM |
| AAK1                          | 20             | BRK                 | 0.05           |
| ABL1(E255K)-phosphorylated    | 0.35           | BRSK1               | 54             |
| ABL1(F317I)-nonphosphorylated | 1.1            | BRSK2               | 100            |
| ABL1(F317I)-phosphorylated    | 7.8            | BTK                 | 0              |
| ABL1(F317L)-nonphosphorylated | 0.1            | BUB1                | 0              |
| ABL1(F317L)-phosphorylated    | 0.2            | CAMK1               | 1              |
| ABL1(H396P)-nonphosphorylated | 0              | CAMK1B              | 19             |
| ABL1(H396P)-phosphorylated    | 0              | CAMK1D              | 0              |
| ABL1(M351T)-phosphorylated    | 0.3            | CAMK1G              | 43             |
| ABL1(Q252H)-nonphosphorylated | 0              | CAMK2A              | 78             |
| ABL1(Q252H)-phosphorylated    | 0.05           | CAMK2B              | 91             |
| ABL1(T315I)-nonphosphorylated | 3.5            | CAMK2D              | 91             |
| ABL1(T315I)-phosphorylated    | 2.2            | CAMK2G              | 98             |
| ABL1(Y253F)-phosphorylated    | 0.05           | CAMK4               | 100            |
| ABL1-nonphosphorylated        | 0              | CAMKK1              | 97             |
| ABL1-phosphorylated           | 0.05           | CAMKK2              | 95             |
| ABL2                          | 0.35           | CASK                | 83             |
| ACVR1                         | 2.9            | CDC2L1              | 80             |
| ACVR1B                        | 2.8            | CDC2L2              | 66             |
| ACVR2A                        | 0              | CDC2L5              | 85             |
| ACVR2B                        | 0              | CDK11               | 100            |
| ACVRL1                        | 7.8            | CDK2                | 55             |
| ADCK3                         | 19             | CDK3                | 87             |
| ADCK4                         | 0              | CDK4                | 1.8            |
| AKT1                          | 100            | CDK4-cyclinD1       | 0.3            |
| AKT2                          | 46             | CDK4-cyclinD3       | 3              |
| AKT3                          | 31             | CDK5                | 97             |
| ALK                           | 16             | CDK7                | 7.2            |
| ALK(C1156Y)                   | 6.8            | CDK8                | 32             |
| ALK(L1196M)                   | 4.6            | CDK9                | 98             |
| AMPK-alpha1                   | 9.1            | CDKL1               | 99             |
| AMPK-alpha2                   | 17             | CDKL2               | 4.2            |
| ANKK1                         | 100            | CDKL3               | 0              |
| ARK5                          | 16             | CDKL5               | 100            |
| ASK1                          | 100            | CHEK1               | 32             |
| ASK2                          | 0              | CHEK2               | 33             |
| AURKA                         | 19             | CIT                 | 6.9            |
| AURKB                         | 36             | CLK1                | 53             |
| AURKC                         | 26             | CLK2                | 39             |
| AXL                           | 0              | CLK3                | 59             |
| BIKE                          | 1.5            | CLK4                | 100            |
| BLK                           | 0              | CSF1R               | 0.05           |
| BMPR1A                        | 5.4            | CSF1R-autoinhibited | 0.05           |
| BMPR1B                        | 0              | CSK                 | 0.05           |
| BMPR2                         | 9              | CSNK1A1             | 7.9            |
| BMX                           | 0.4            | CSNK1A1L            | 22             |
| BRAF                          | 13             | CSNK1D              | 22             |
| BRAF(V600E)                   | 3.7            | CSNK1E              | 0.8            |
|                               |                | CSNK1G1             | 83             |



| Target                    | D3003          | Target                | D3003          |
|---------------------------|----------------|-----------------------|----------------|
| Gene Symbol               | %Ctrl @ 1000nM | Gene Symbol           | %Ctrl @ 1000nM |
| CSNK1G2                   | 87             | ERBB4                 | 1.8            |
| CSNK1G3                   | 83             | ERK1                  | 46             |
| CSNK2A1                   | 92             | ERK2                  | 86             |
| CSNK2A2                   | 100            | ERK3                  | 58             |
| CTK                       | 18             | ERK4                  | 77             |
| DAPK1                     | 50             | ERK5                  | 2.9            |
| DAPK2                     | 81             | ERK8                  | 27             |
| DAPK3                     | 53             | ERN1                  | 25             |
| DCAMKL1                   | 1.9            | FAK                   | 5.3            |
| DCAMKL2                   | 3.8            | FER                   | 0.05           |
| DCAMKL3                   | 0.95           | FES                   | 0.25           |
| DDR1                      | 1.5            | FGFR1                 | 0.4            |
| DDR2                      | 0              | FGFR2                 | 0.15           |
| DLK                       | 8.1            | FGFR3                 | 0.8            |
| DMPK                      | 8.2            | FGFR3(G697C)          | 0.95           |
| DMPK2                     | 2.5            | FGFR4                 | 0.55           |
| DRAK1                     | 1.2            | FGR                   | 0              |
| DRAK2                     | 99             | FLT1                  | 0.45           |
| DYRK1A                    | 99             | FLT3                  | 0.05           |
| DYRK1B                    | 16             | FLT3(D835H)           | 2.1            |
| DYRK2                     | 79             | FLT3(D835V)           | 0              |
| EGFR                      | 2.8            | FLT3(D835Y)           | 12             |
| EGFR(E746-A750del)        | 0              | FLT3(ITD)             | 1.2            |
| EGFR(G719C)               | 0.15           | FLT3(ITD,D835V)       | 0              |
| EGFR(G719S)               | 0.65           | FLT3(ITD,F691L)       | 0              |
| EGFR(L747-E749del, A750P) | 10             | FLT3(K663Q)           | 11             |
| EGFR(L747-S752del, P753S) | 2.5            | FLT3(N841I)           | 12             |
| EGFR(L747-T751del,Sins)   | 8.1            | FLT3(R834Q)           | 1.9            |
| EGFR(L858R)               | 2.4            | FLT3-autoinhibited    | 19             |
| EGFR(L858R,T790M)         | 1.4            | FLT4                  | 0.05           |
| EGFR(L861Q)               | 0.15           | FRK                   | 0.05           |
| EGFR(S752-I759del)        | 2.4            | FYN                   | 0.2            |
| EGFR(T790M)               | 0.3            | GAK                   | 2.7            |
| EIF2AK1                   | 31             | GCN2(Kin.Dom.2,S808G) | 7.2            |
| EPHA1                     | 0.15           | GRK1                  | 66             |
| EPHA2                     | 0              | GRK2                  | 83             |
| EPHA3                     | 0.35           | GRK3                  | 76             |
| EPHA4                     | 0              | GRK4                  | 2.3            |
| EPHA5                     | 0.5            | GRK7                  | 86             |
| EPHA6                     | 0              | GSK3A                 | 100            |
| EPHA7                     | 53             | GSK3B                 | 41             |
| EPHA8                     | 0.25           | HASPIN                | 87             |
| EPHB1                     | 0.2            | HCK                   | 0.15           |
| EPHB2                     | 0              | HIPK1                 | 84             |
| EPHB3                     | 0              | HIPK2                 | 82             |
| EPHB4                     | 0              | HIPK3                 | 1.8            |
| EPHB6                     | 0              | HIPK4                 | 24             |
| ERBB2                     | 0              | HPK1                  | 91             |
| ERBB3                     | 0              | HUNK                  | 8.8            |

| Target                       | D3003          |
|------------------------------|----------------|
| Gene Symbol                  | %Ctrl @ 1000nM |
| ICK                          | 100            |
| IGF1R                        | 60             |
| IKK-alpha                    | 78             |
| IKK-beta                     | 13             |
| IKK-epsilon                  | 0              |
| INSR                         | 49             |
| INSRR                        | 73             |
| IRAK1                        | 18             |
| IRAK3                        | 75             |
| IRAK4                        | 100            |
| ITK                          | 71             |
| JAK1(JH1domain-catalytic)    | 2.9            |
| JAK1(JH2domain-pseudokinase) | 10             |
| JAK2(JH1domain-catalytic)    | 0              |
| JAK3(JH1domain-catalytic)    | 0              |
| JNK1                         | 0.4            |
| JNK2                         | 0.25           |
| JNK3                         | 0.85           |
| KIT                          | 0.05           |
| KIT(A829P)                   | 1.5            |
| KIT(D816H)                   | 0              |
| KIT(D816V)                   | 0              |
| KIT(L576P)                   | 0              |
| KIT(V559D)                   | 0.05           |
| KIT(V559D,T670I)             | 3.5            |
| KIT(V559D,V654A)             | 0              |
| KIT-autoinhibited            | 0.2            |
| LATS1                        | 2.1            |
| LATS2                        | 0              |
| LCK                          | 0.15           |
| LIMK1                        | 3.9            |
| LIMK2                        | 0              |
| LKB1                         | 22             |
| LOK                          | 0              |
| LRRK2                        | 20             |
| LRRK2(G2019S)                | 9.3            |
| LTK                          | 5.1            |
| LYN                          | 0              |
| LZK                          | 21             |
| MAK                          | 80             |
| MAP3K1                       | 0              |
| MAP3K15                      | 88             |
| MAP3K2                       | 0              |
| MAP3K3                       | 0.1            |
| MAP3K4                       | 2.1            |
| MAP4K2                       | 4.5            |
| MAP4K3                       | 0.3            |
| MAP4K4                       | 3.9            |
| MAP4K5                       | 0              |

| Target      | D3003          |
|-------------|----------------|
| Gene Symbol | %Ctrl @ 1000nM |
| MAPKAPK2    | 100            |
| MAPKAPK5    | 100            |
| MARK1       | 27             |
| MARK2       | 1.8            |
| MARK3       | 1              |
| MARK4       | 66             |
| MAST1       | 46             |
| MEK1        | 0              |
| MEK2        | 0              |
| MEK3        | 1.8            |
| MEK4        | 0.15           |
| MEK5        | 0.1            |
| MEK6        | 30             |
| MELK        | 7.2            |
| MERTK       | 2              |
| MET         | 4.5            |
| MET(M1250T) | 4.9            |
| MET(Y1235D) | 6.8            |
| MINK        | 2.5            |
| MKK7        | 96             |
| MKNK1       | 81             |
| MKNK2       | 41             |
| MLCK        | 100            |
| MLK1        | 1.8            |
| MLK2        | 7.2            |
| MLK3        | 1              |
| MRCKA       | 59             |
| MRCKB       | 19             |
| MST1        | 1.2            |
| MST1R       | 46             |
| MST2        | 66             |
| MST3        | 2.4            |
| MST4        | 3.6            |
| MTOR        | 86             |
| MUSK        | 37             |
| MYLK        | 80             |
| MYLK2       | 66             |
| MYLK4       | 100            |
| MYO3A       | 44             |
| MYO3B       | 11             |
| NDR1        | 24             |
| NDR2        | 25             |
| NEK1        | 50             |
| NEK10       | 34             |
| NEK11       | 0.6            |
| NEK2        | 1.2            |
| NEK3        | 99             |
| NEK4        | 100            |
| NEK5        | 16             |

| Target                | D3003          |
|-----------------------|----------------|
| Gene Symbol           | %Ctrl @ 1000nM |
| NEK6                  | 71             |
| NEK7                  | 89             |
| NEK9                  | 86             |
| NIK                   | 85             |
| NIM1                  | 59             |
| NLK                   | 0.2            |
| OSR1                  | 5.5            |
| p38-alpha             | 0.2            |
| p38-beta              | 0              |
| p38-delta             | 58             |
| p38-gamma             | 60             |
| PAK1                  | 3.3            |
| PAK2                  | 49             |
| PAK3                  | 11             |
| PAK4                  | 8.9            |
| PAK6                  | 5.2            |
| PAK7                  | 0.3            |
| PCTK1                 | 2.1            |
| PCTK2                 | 9.4            |
| PCTK3                 | 86             |
| PDGFRA                | 0              |
| PDGFRB                | 0              |
| PDPK1                 | 98             |
| PFCDPK1(P.falciparum) | 0              |
| PFPK5(P.falciparum)   | 65             |
| PFTAIRE2              | 53             |
| PFTK1                 | 73             |
| PHKG1                 | 100            |
| PHKG2                 | 66             |
| PIK3C2B               | 4.1            |
| PIK3C2G               | 43             |
| PIK3CA                | 100            |
| PIK3CA(C420R)         | 98             |
| PIK3CA(E542K)         | 100            |
| PIK3CA(E545A)         | 100            |
| PIK3CA(E545K)         | 100            |
| PIK3CA(H1047L)        | 88             |
| PIK3CA(H1047Y)        | 96             |
| PIK3CA(I800L)         | 74             |
| PIK3CA(M1043I)        | 86             |
| PIK3CA(Q546K)         | 100            |
| PIK3CB                | 98             |
| PIK3CD                | 58             |
| PIK3CG                | 61             |
| PIK4CB                | 59             |
| PIKFYVE               | 35             |
| PIM1                  | 94             |
| PIM2                  | 100            |
| PIM3                  | 88             |

| Target                        | D3003         |
|-------------------------------|---------------|
| Gene Symbol                   | %Ctrl @ 100nM |
| PIP5K1A                       | 77            |
| PIP5K1C                       | 71            |
| PIP5K2B                       | 3.5           |
| PIP5K2C                       | 0.1           |
| PKAC-alpha                    | 0.2           |
| PKAC-beta                     | 1.4           |
| PKMYT1                        | 48            |
| PKN1                          | 69            |
| PKN2                          | 20            |
| PKNB(M.tuberculosis)          | 0.2           |
| PLK1                          | 100           |
| PLK2                          | 97            |
| PLK3                          | 69            |
| PLK4                          | 29            |
| PRKCD                         | 5.7           |
| PRKCE                         | 0             |
| PRKCH                         | 14            |
| PRKCI                         | 13            |
| PRKCQ                         | 26            |
| PRKD1                         | 1.9           |
| PRKD2                         | 2.7           |
| PRKD3                         | 0             |
| PRKG1                         | 66            |
| PRKG2                         | 76            |
| PRKR                          | 69            |
| PRKX                          | 96            |
| PRP4                          | 5.5           |
| PYK2                          | 5.3           |
| QSK                           | 1.4           |
| RAF1                          | 68            |
| RET                           | 0             |
| RET(M918T)                    | 0.1           |
| RET(V804L)                    | 0.05          |
| RET(V804M)                    | 0.25          |
| RIOK1                         | 2.6           |
| RIOK2                         | 33            |
| RIOK3                         | 7.5           |
| RIPK1                         | 52            |
| RIPK2                         | 0.6           |
| RIPK4                         | 93            |
| RIPK5                         | 2.4           |
| ROCK1                         | 54            |
| ROCK2                         | 24            |
| ROS1                          | 28            |
| RPS6KA4(Kin.Dom.1-N-terminal) | 92            |
| RPS6KA4(Kin.Dom.2-C-terminal) | 100           |
| RPS6KA5(Kin.Dom.1-N-terminal) | 100           |
| RPS6KA5(Kin.Dom.2-C-terminal) | 74            |
| RSK1(Kin.Dom.1-N-terminal)    | 83            |

| Target                     | D3003         |
|----------------------------|---------------|
| Gene Symbol                | %Ctrl @ 100nM |
| RSK1(Kin.Dom.2-C-terminal) | 17            |
| RSK2(Kin.Dom.1-N-terminal) | 12            |
| RSK2(Kin.Dom.2-C-terminal) | 0.15          |
| RSK3(Kin.Dom.1-N-terminal) | 56            |
| RSK3(Kin.Dom.2-C-terminal) | 64            |
| RSK4(Kin.Dom.1-N-terminal) | 15            |
| RSK4(Kin.Dom.2-C-terminal) | 1.1           |
| S6K1                       | 26            |
| SBK1                       | 5             |
| SGK                        | 86            |
| Sgk110                     | 0             |
| SGK2                       | 97            |
| SGK3                       | 89            |
| SIK                        | 0.9           |
| SIK2                       | 1.1           |
| SLK                        | 0.3           |
| SNARK                      | 0.55          |
| SNRK                       | 94            |
| SRC                        | 0.1           |
| SRMS                       | 4.9           |
| SRPK1                      | 5.1           |
| SRPK2                      | 17            |
| SRPK3                      | 20            |
| STK16                      | 0             |
| STK33                      | 7.2           |
| STK35                      | 3.2           |
| STK36                      | 0.2           |
| STK39                      | 55            |
| SYK                        | 1.2           |
| TAK1                       | 1.2           |
| TAOK1                      | 0.05          |
| TAOK2                      | 0             |
| TAOK3                      | 0.9           |
| TBK1                       | 4.4           |
| TEC                        | 1.2           |
| TESK1                      | 0             |
| TGFBR1                     | 2.5           |
| TGFBR2                     | 2.7           |
| TIE1                       | 15            |
| TIE2                       | 0.75          |
| TLK1                       | 33            |
| TLK2                       | 87            |
| TNIK                       | 0.25          |
| TNK1                       | 0.3           |
| TNK2                       | 0.2           |
| TNNI3K                     | 1.2           |
| TRKA                       | 0             |
| TRKB                       | 1.8           |
| TRKC                       | 0.9           |

| Target                        | D3003         |
|-------------------------------|---------------|
| Gene Symbol                   | %Ctrl @ 100nM |
| TRPM6                         | 99            |
| TSSK1B                        | 2.7           |
| TSSK3                         | 25            |
| TTK                           | 0.9           |
| TXK                           | 0.15          |
| TYK2(JH1 domain-catalytic)    | 0             |
| TYK2(JH2 domain-pseudokinase) | 100           |
| TYRO3                         | 15            |
| ULK1                          | 3             |
| ULK2                          | 0.3           |
| ULK3                          | 0.1           |
| VEGFR2                        | 0             |
| VPS34                         | 20            |
| VRK2                          | 73            |
| WEE1                          | 2.9           |
| WEE2                          | 4.5           |
| WNK1                          | 100           |
| WNK2                          | 4.1           |
| WNK3                          | 51            |
| WNK4                          | 64            |
| YANK1                         | 6.9           |
| YANK2                         | 29            |
| YANK3                         | 0.55          |
| YES                           | 0.15          |
| YSK1                          | 8.7           |
| YSK4                          | 0             |
| ZAK                           | 0.3           |
| ZAP70                         | 6.1           |

## Reference

1. Yun, C. H.; Boggon, T. J.; Li, Y.; Woo, M. S.; Greulich, H.; Meyerson, M.; Eck, M. J. Structures of lung cancer-derived EGFR mutants and inhibitor complexes: mechanism of activation and insights into differential inhibitor sensitivity. *Cancer Cell*. 2007, 11, 217-227.
2. Minor, W.; Cymborowski, M.; Otwinowski, Z.; Chruszcz, M. HKL-3000: the integration of data reduction and structure solution--from diffraction images to an initial model in minutes. *Acta Crystallogr. D Biol. Crystallogr.* 2006, 62, 859-866.

3. Emsley, P.; Lohkamp, B.; Scott, W. G.; Cowtan, K. Features and development of Coot. *Acta Crystallogr. D Biol. Crystallogr.* 2010, *66*, 486-501.
4. Adams, P. D.; Afonine, P. V.; Bunkóczi, G.; Chen, V. B.; Davis, I. W.; Echols, N.; Headd, J. J.; Hung, L. W.; Kapral, G. J.; Grosse-Kunstleve, R. W.; McCoy, A. J.; Moriarty, N. W.; Oeffner, R.; Read, R. J.; Richardson, D. C.; Richardson, J. S.; Terwilliger, T. C.; Zwart, P. H. PHENIX: a comprehensive Python-based system for macromolecular structure solution. *Acta Crystallogr. D Biol. Crystallogr.* 2010, *66*, 213-221.
